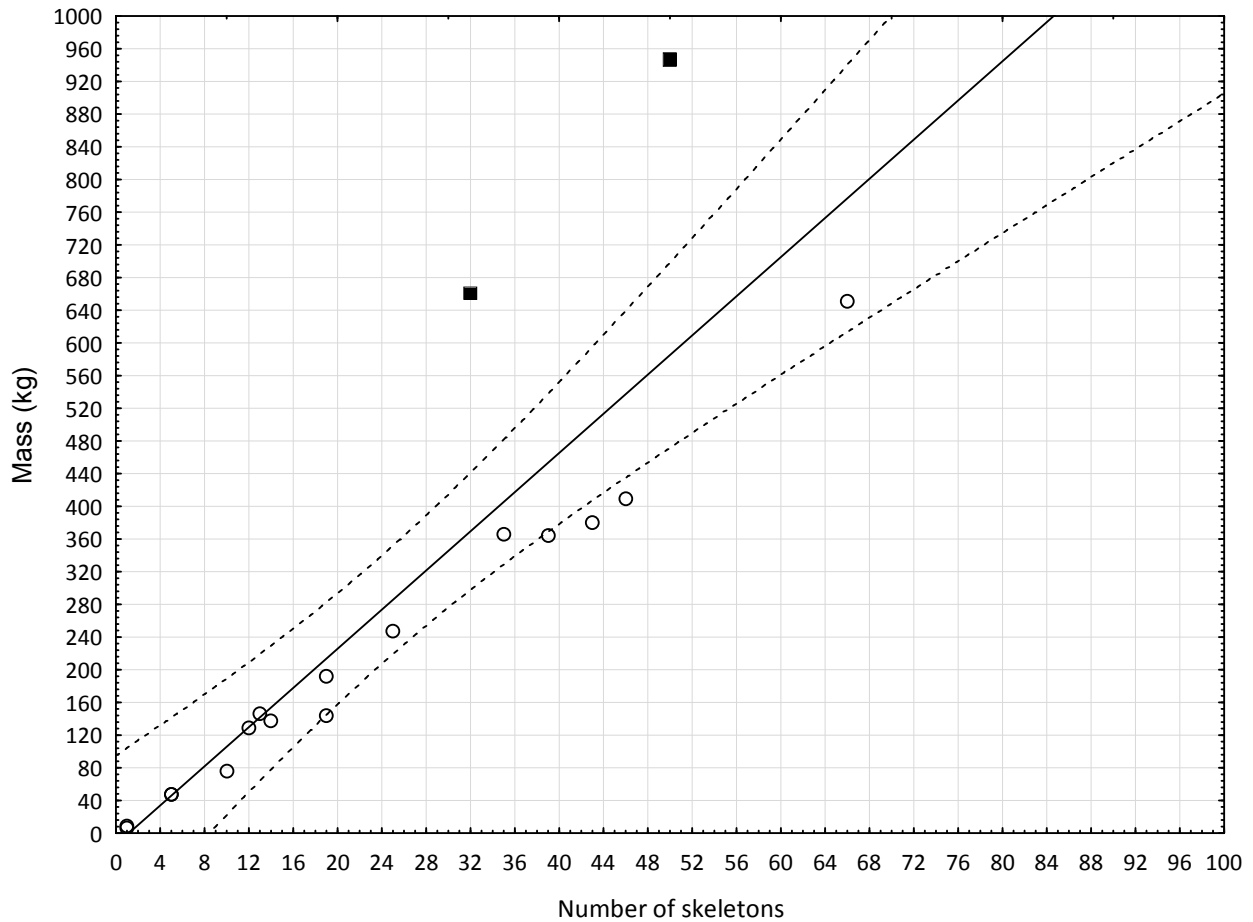

**S1 Fig. Linear regression using the same data set as in Fig. 2, but anomalous data for two consignments not corrected.** The regression was calculated from 510 skeletons consolidated into 15 consignments, and two skeletons from DMNH (AZ656; AZ2389). The consignments marked as ■ weighed an average of 19.8kg each – which is more than twice the mean mass for skeletons presented in Table 2. The dashed lines parallel to the regression (solid line) indicate the range within 95% of the mean. The regression equation is  $y=11.983x-14.03$ , and  $r^2=0.745$ . [Compare with Fig. 2 where the anomalies were corrected, and the mean skeleton mass is 9.6kg]
